# Supplementary material for: A detailed quantum chemical investigation on the hydrolysis mechanism of osmium(iii) anticancer drug, (ImH)[trans-OsCl4(DMSO)(Im)] (Os-NAMI-A; Im = imidazole)
Source: Royal Society of Chemistry journal article supplement (doi:10.1039/d1nj00783a), 2021-01-01
Supplement: d1nj00783a1.pdf [file d1nj00783a1.pdf]

## Supporting Information

### A Detailed Quantum Chemical Investigation on Hydrolysis Mechanism of Osmium(III) Anticancer Drug, (ImH)[*trans*-OsCl<sub>4</sub>(DMSO)(Im)] (Os-NAMI-A; Im=imidazole)

Amit Kumar Pradhan, Abhijit Shyam and Paritosh Mondal\*

Department of Chemistry, Assam University, Silchar-788011, Assam, India

\*Corresponding author: Email: [paritos\\_au@yahoo.co.in](mailto:paritos_au@yahoo.co.in)

## List of Contents

- 1. Table S1:** Selected bond lengths (Å), bond angles (°) of all the stationary points involved in the first hydrolysis of Os-NAMI-A, calculated at M06-2X/(LanL2DZ+6-31G(d, p)).
- 2. Table S2:** Selected bond lengths (Å), bond angles (°) of all the stationary points involved in the second hydrolysis of Os-NAMI-A, calculated at M06-2X/(LanL2DZ+6-31G(d, p)).
- 3. Table S3:** Selected bond lengths (Å), bond angles (°) of all the stationary points involved in the third hydrolysis of Os-NAMI-A, calculated at M06-2X/(LanL2DZ+6-31G(d, p)).
- 4. Table S4:** Change of Gibbs free energies ( $\Delta G$ ) and enthalpies ( $\Delta H$ ) for the first hydrolysis of Os-NAMI-A calculated at 298.15 K in solvent medium. (Energy values are in kcal/mol).
- 5. Table S5:** Change of Gibbs free energies ( $\Delta G$ ) and enthalpies ( $\Delta H$ ) for the second hydrolysis of Os-NAMI-A calculated at 298.15 K in solvent medium. (Energy values are in kcal/mol).
- 6. Table S6:** Change of Gibbs free energies ( $\Delta G$ ) and enthalpies ( $\Delta H$ ) for the third hydrolysis steps of Os-NAMI-A calculated at 298.15 K in solvent medium. (Energy values are in kcal/mol).
- 7. Table S7:** NPA charges on the central Os, incoming O (H<sub>2</sub>O), leaving Cl or S (DMSO) atoms, calculated for each hydrolysis step of Os-NAMI-A (in the unit of electronic charge |e|).
- 8. Table S8:** The Cartesian coordinate of transition states, reactants and products intermediates, involve in first, second and third hydrolysis of Os-NAMI-A.

**1. Table S1.** Selected bond lengths (Å), bond angles (°) of all the stationary points involved in the first hydrolysis of Os-NAMI-A, calculated at M06- 2X/(LanL2DZ+6-31G(d, p))

| Reaction             | Parameters       | R    | RC-1 <sub>A</sub> | TS-1 <sub>A</sub> | PC-1 <sub>A</sub> | P-1A |
|----------------------|------------------|------|-------------------|-------------------|-------------------|------|
| R → P-1A<br>(Path-A) | Os-S(DMSO)       | 2.34 | 2.34              | 3.21              | 4.52              | --   |
|                      | Os-O1(wat1)      | --   | 4.01              | 2.96              | 2.13              | 2.20 |
|                      | ∠S-Os-O1(wat1)   |      |                   | 54.76             |                   |      |
| R → P-1B<br>(Path-B) |                  | R    | RC-1 <sub>B</sub> | TS-1 <sub>B</sub> | PC-1 <sub>B</sub> | P-1B |
|                      | Os-Cl1           | 2.42 | 2.42              | 2.91              | 4.49              | --   |
|                      | Os-O1(wat1)      | --   | 3.99              | 2.57              | 2.08              | 2.13 |
|                      | ∠Cl1-Os-O1(wat1) |      |                   | 62.38             |                   |      |

**2. Table S2.** Selected bond lengths (Å), bond angles (°) of all the stationary points involved in the second hydrolysis of Os-NAMI-A, calculated at M06- 2X/(LanL2DZ+6-31G(d, p))

| Reaction                            | Parameters       | P-1A | RC-2              | TS-2              | PC-2              | P-2A |
|-------------------------------------|------------------|------|-------------------|-------------------|-------------------|------|
| P-1A → P2A<br>(Step-2)              | Os-Cl1           | 2.43 | 2.45              | 3.08              | 4.33              | --   |
|                                     | Os-O2(wat2)      | --   | 3.63              | 2.53              | 2.07              | 2.15 |
|                                     | ∠Cl1-Os-O2(wat2) |      |                   | 60.64             |                   |      |
| P-1B → P-2A<br>(Step-3)<br>(Path-A) |                  | P-1B | RC-2 <sub>A</sub> | TS-2 <sub>A</sub> | PC-2 <sub>A</sub> | P-2A |
|                                     | Os-S(DMSO)       | 2.31 | 2.34              | 3.25              | 4.67              | --   |
|                                     | Os-O2(wat2)      | --   | 3.69              | 2.79              | 2.09              | 2.18 |
|                                     | ∠S-Os-O2(wat2)   |      |                   | 58.04             |                   |      |
| P-1B → P-2B<br>(Step-3)<br>(Path-B) |                  | P-1B | RC-2 <sub>B</sub> | TS-2 <sub>B</sub> | PC-2 <sub>B</sub> | P-2B |
|                                     | Os-Cl2(DMSO)     | 2.40 | 2.41              | 2.77              | 3.91              | --   |
|                                     | Os-O2(wat2)      | --   | 3.93              | 2.62              | 2.14              | 2.12 |
|                                     | ∠Cl2-Os-O2(wat2) |      |                   | 64.07             |                   |      |
| P-1B → P-2C<br>(Step-3)<br>(Path-C) |                  | P-1B | RC-2 <sub>C</sub> | TS-2 <sub>C</sub> | PC-2 <sub>C</sub> | P-2C |
|                                     | Os-Cl3(DMSO)     | 2.38 | 2.39              | 2.79              | 4.18              | --   |
|                                     | Os-O2(wat2)      | --   | 3.94              | 2.42              | 2.05              | 2.10 |
|                                     | ∠Cl3-Os-O2(wat2) |      |                   | 63.44             |                   |      |

**3. Table S3.** Selected bond lengths (Å), bond angles (°) of all the stationary points involved in the third hydrolysis of Os-NAMI-A, calculated at M06- 2X/(LanL2DZ+6-31G(d, p))

| Reaction                | Parameters       | P-2A | RC-3 <sub>A</sub> | TS-3 <sub>A</sub> | PC-3 <sub>A</sub> | P-2A |
|-------------------------|------------------|------|-------------------|-------------------|-------------------|------|
| P-2A → P3A<br>(Path-A)  | Os-Cl2           | 2.42 | 2.41              | 2.71              | 3.73              | --   |
|                         | Os-O3(wat3)      | --   | 3.86              | 2.68              | 2.16              | 2.12 |
|                         | ∠Cl2-Os-O3(wat3) |      |                   | 66.19             |                   |      |
| P-2A → P-3B<br>(Path-B) |                  | P-2A | RC-3 <sub>B</sub> | TS-3 <sub>B</sub> | PC-3 <sub>B</sub> | P-2A |
|                         | Os-Cl3           | 2.38 | 2.38              | 2.78              | 3.95              | --   |
|                         | Os-O3(wat3)      | --   | 3.86              | 2.50              | 2.11              | 2.09 |
|                         | ∠Cl3-Os-O3(wat3) |      |                   | 65.48             |                   |      |

|                                 |                |             |              |              |              |             |
|---------------------------------|----------------|-------------|--------------|--------------|--------------|-------------|
| <b>P-2B → P-3A<br/>(Step-2)</b> | Os-S(DMSO)     | <b>P-2B</b> | <b>RC-3</b>  | <b>TS-3</b>  | <b>PC-3</b>  | <b>P-2B</b> |
|                                 | Os-O3(wat3)    | 2.33        | 2.34         | 2.90         | 4.40         | --          |
|                                 | ∠S-Os-O3(wat3) | --          | 3.75         | 2.63         | 2.17         | 2.19        |
|                                 |                |             |              | 60.13        |              |             |
| <b>P-2B → P-3B<br/>(Step-3)</b> | Os-S(DMSO)     | <b>P-2C</b> | <b>RC-3'</b> | <b>TS-3'</b> | <b>PC-3'</b> | <b>P-2C</b> |
|                                 | Os-O3(wat3)    | 2.37        | 2.37         | 2.86         | 4.40         | --          |
|                                 | ∠S-Os-O3(wat3) | --          | 3.72         | 2.55         | 2.13         | 2.10        |
|                                 |                |             |              | 63.03        |              |             |

4. **Table S4.** Change of Gibbs free energies ( $\Delta G$ ) and enthalpies ( $\Delta H$ ) for the first hydrolysis of Os-NAMI-A calculated at 298.15 K in solvent medium. (Energy values are in kcal/mol)

| <b>Reaction</b>              | <b>Species</b>    | <b><math>\Delta G(\text{aq})</math></b> | <b><math>\Delta H(\text{aq})</math></b> |
|------------------------------|-------------------|-----------------------------------------|-----------------------------------------|
| <b>R → P-1A<br/>(step-1)</b> | RC-1 <sub>A</sub> | 0                                       | 0                                       |
|                              | TS-1 <sub>A</sub> | 24.66                                   | 25.30                                   |
|                              | PC-1 <sub>A</sub> | 4.71                                    | 5.77                                    |
| <b>R → P-1B<br/>(step-1)</b> | RC-1 <sub>B</sub> | 0                                       | 0                                       |
|                              | TS-1 <sub>B</sub> | 28.72                                   | 27.49                                   |
|                              | PC-1 <sub>B</sub> | 1.24                                    | -0.11                                   |

5. **Table S5:** Change of Gibbs free energies ( $\Delta G$ ) and enthalpies ( $\Delta H$ ) for the second hydrolysis of Os-NAMI-A calculated at 298.15 K in solvent medium. (Energy values are in kcal/mol)

| <b>Reaction</b>                 | <b>Species</b>    | <b><math>\Delta G(\text{aq})</math></b> | <b><math>\Delta H(\text{aq})</math></b> |
|---------------------------------|-------------------|-----------------------------------------|-----------------------------------------|
| <b>P-1A → P-2A<br/>(step-1)</b> | RC-2              | 0                                       | 0                                       |
|                                 | TS-2              | 25.38                                   | 24.31                                   |
|                                 | PC-2              | 2.99                                    | 4.06                                    |
| <b>P-1B → P-2A<br/>(step-2)</b> | RC-2 <sub>A</sub> | 0                                       | 0                                       |
|                                 | TS-2 <sub>A</sub> | 24.83                                   | 26.15                                   |
|                                 | PC-2 <sub>A</sub> | 10.22                                   | 13.73                                   |
| <b>P-1B → P-2B<br/>(step-3)</b> | RC-2 <sub>B</sub> | 0                                       | 0                                       |
|                                 | TS-2 <sub>B</sub> | 22.62                                   | 21.13                                   |
|                                 | PC-2 <sub>B</sub> | 4.87                                    | 3.17                                    |
| <b>P-1B → P-2C<br/>(step-3)</b> | RC-2 <sub>C</sub> | 0                                       | 0                                       |
|                                 | TS-2 <sub>C</sub> | 29.56                                   | 28.11                                   |
|                                 | PC-2 <sub>C</sub> | 5.82                                    | 4.08                                    |

**6. Table S6:** Change of Gibbs free energies ( $\Delta G$ ) and enthalpies ( $\Delta H$ ) for the third hydrolysis of Os-NAMI-A calculated at 298.15 K in solvent medium. (Energy values are in kcal/mol)

| Reaction                                               | Species           | $\Delta G(\text{aq})$ | $\Delta H(\text{aq})$ |
|--------------------------------------------------------|-------------------|-----------------------|-----------------------|
| <b>P-2A <math>\rightarrow</math> P3A<br/>(Path-A)</b>  | RC-3 <sub>A</sub> | 0                     | 0                     |
|                                                        | TS-3 <sub>A</sub> | 17.27                 | 14.93                 |
|                                                        | PC-3 <sub>A</sub> | 4.93                  | 2.35                  |
| <b>P-2A <math>\rightarrow</math> P-3B<br/>(Path-B)</b> | RC-3 <sub>B</sub> | 0                     | 0                     |
|                                                        | TS-3 <sub>B</sub> | 24.86                 | 20.82                 |
|                                                        | PC-3 <sub>B</sub> | 3.39                  | 2.95                  |
| <b>P-2B <math>\rightarrow</math> P-3A<br/>(Step-2)</b> | RC-3              | 0                     | 0                     |
|                                                        | TS-3              | 17.83                 | 16.60                 |
|                                                        | PC-3              | -8.56                 | -9.87                 |
| <b>P-2B <math>\rightarrow</math> P-3B<br/>(Step-3)</b> | RC-3'             | 0                     | 0                     |
|                                                        | TS-3'             | 23.09                 | 20.41                 |
|                                                        | PC-3'             | -5.43                 | -5.93                 |

**7. Table S7:** NPA charges on the central Os, incoming O (H<sub>2</sub>O), leaving Cl or S (DMSO) atoms, calculated for each hydrolysis step of Os-NAMI-A (in the unit of electronic charge |e|)

| Reaction                            | Atom     | R      | RC     | TS     | PC     | P      |
|-------------------------------------|----------|--------|--------|--------|--------|--------|
| DMSO Hydrolysis of R<br>(Step-1)    | Os       | -0.195 | -0.208 | 0.279  | 0.270  | 0.234  |
|                                     | S(DMSO)  | 1.521  | 1.511  | 1.259  | 1.196  | --     |
|                                     | O1(wat1) | --     | -0.992 | -0.969 | -0.881 | -0.829 |
| Cl1 Hydrolysis of R<br>(Step-1)     | Os       | -0.195 | -0.200 | 0.040  | 0.006  | -0.023 |
|                                     | Cl1      | -0.401 | -0.404 | -0.709 | -0.872 | --     |
|                                     | O1(wat1) | --     | -0.981 | -0.915 | -0.869 | -0.821 |
| Cl1 Hydrolysis of P-1A<br>(Step-2)  | Os       | 0.234  | 0.242  | 0.463  | 0.471  | 0.433  |
|                                     | Cl1      | -0.447 | -0.466 | -0.779 | -0.869 | --     |
|                                     | O2(wat2) | --     | -0.955 | -0.966 | -0.867 | -0.820 |
| DMSO Hydrolysis of P-1B<br>(Step-3) | Os       | -0.023 | -0.009 | 0.442  | 0.465  | 0.433  |
|                                     | S(DMSO)  | 1.502  | 1.499  | 1.238  | 1.191  | --     |
|                                     | O2(wat2) | --     | -0.955 | -0.988 | -0.899 | -0.833 |
| Cl2 Hydrolysis of P-1B<br>(Step-3)  | Os       | -0.023 | -0.026 | 0.153  | 0.213  | 0.196  |
|                                     | Cl2      | -0.375 | -0.380 | -0.651 | -0.810 | --     |
|                                     | O2(wat2) | --     | -0.973 | -0.902 | -0.876 | -0.808 |
| Cl3 Hydrolysis of P-1B<br>(Step-3)  | Os       | -0.023 | -0.027 | 0.183  | 0.237  | 0.232  |
|                                     | Cl3      | -0.351 | -0.359 | -0.651 | -0.821 | --     |
|                                     | O2(wat2) | --     | -0.907 | -0.955 | -0.855 | -0.900 |
| Cl2 Hydrolysis of P-2A<br>(Step-4)  | Os       | 0.438  | 0.423  | 0.552  | 0.666  | 0.622  |
|                                     | Cl2      | -0.453 | -0.434 | -0.649 | -0.838 | --     |
|                                     | O3(wat3) | --     | -0.974 | -0.916 | -0.857 | -0.821 |
| Cl3 Hydrolysis of P-2A<br>(Step-4)  | Os       | 0.438  | 0.423  | 0.610  | 0.678  | 0.554  |
|                                     | Cl3      | -0.403 | -0.393 | -0.671 | -0.824 | --     |
|                                     | O3(wat3) | --     | -0.974 | -0.894 | -0.824 | -0.797 |
| DMSO Hydrolysis of P-2B             | Os       | 0.196  | 0.218  | 0.591  | 0.619  | 0.614  |

|                                     |          |       |        |        |        |        |
|-------------------------------------|----------|-------|--------|--------|--------|--------|
| (Step-5)                            | S(DMSO)  | 1.485 | 1.471  | 1.297  | 1.203  | --     |
|                                     | O3(wat3) | --    | -0.967 | -0.929 | -0.876 | -0.843 |
| DMSO Hydrolysis of P-2C<br>(Step-6) | Os       | 0.243 | 0.245  | 0.591  | 0.682  | 0.554  |
|                                     | S(DMSO)  | 1.468 | 1.473  | 1.297  | 1.205  | --     |
|                                     | O3(wat3) | --    | -0.934 | -0.929 | -0.851 | -0.826 |

**8. Table S8:** The Cartesian coordinate of transition states, reactants and products intermediates, involve in first, second and third hydrolysis reaction of Os-NAMI-A

### RC-1<sub>A</sub>

| Center Number | Atomic Number | Atomic Type | Coordinates (Angstroms) |           |           |
|---------------|---------------|-------------|-------------------------|-----------|-----------|
|               |               |             | X                       | Y         | Z         |
| 1             | 17            | 0           | -1.693865               | 0.504723  | -0.585566 |
| 2             | 17            | 0           | 1.059986                | 0.612517  | -2.668857 |
| 3             | 17            | 0           | 0.394997                | 0.298450  | 2.133251  |
| 4             | 17            | 0           | 3.112587                | 0.362878  | 0.079043  |
| 5             | 16            | 0           | 0.630490                | -1.945742 | -0.498035 |
| 6             | 8             | 0           | 1.922468                | -2.714832 | -0.600840 |
| 7             | 6             | 0           | -0.339099               | -2.678646 | 0.818635  |
| 8             | 1             | 0           | -1.263907               | -2.107989 | 0.919171  |
| 9             | 1             | 0           | -0.528115               | -3.722052 | 0.561274  |
| 10            | 1             | 0           | 0.274630                | -2.597977 | 1.716950  |
| 11            | 6             | 0           | -0.364092               | -2.400401 | -1.915716 |
| 12            | 1             | 0           | 0.136386                | -2.002427 | -2.797794 |
| 13            | 1             | 0           | -0.416541               | -3.489608 | -1.943807 |
| 14            | 1             | 0           | -1.348971               | -1.945925 | -1.800995 |
| 15            | 7             | 0           | 0.763242                | 2.468702  | -0.121320 |
| 16            | 6             | 0           | 1.447715                | 3.219346  | 0.808798  |
| 17            | 6             | 0           | 0.121712                | 3.312417  | -0.912056 |
| 18            | 1             | 0           | 2.050187                | 2.749902  | 1.569174  |
| 19            | 1             | 0           | -0.506148               | 3.035619  | -1.744163 |
| 20            | 1             | 0           | 1.549407                | 5.436527  | 1.055590  |
| 21            | 1             | 0           | -0.001729               | 5.403412  | -0.963162 |
| 22            | 7             | 0           | 0.369971                | 4.573658  | -0.523010 |
| 23            | 6             | 0           | 1.208088                | 4.540211  | 0.565448  |
| 24            | 76            | 0           | 0.715889                | 0.384357  | -0.276986 |
| 25            | 8             | 0           | 2.602792                | -2.205195 | 2.150218  |
| 26            | 1             | 0           | 2.340957                | -1.273491 | 2.135213  |
| 27            | 1             | 0           | 2.677041                | -2.421025 | 1.206704  |

### TS-1<sub>A</sub>

| Center Number | Atomic Number | Atomic Type | Coordinates (Angstroms) |           |           |
|---------------|---------------|-------------|-------------------------|-----------|-----------|
|               |               |             | X                       | Y         | Z         |
| 1             | 16            | 0           | 2.215945                | -3.369256 | 0.006349  |
| 2             | 8             | 0           | 1.562582                | -4.634204 | -0.552400 |
| 3             | 6             | 0           | 3.668566                | -3.064124 | -1.007712 |
| 4             | 1             | 0           | 4.206987                | -2.212418 | -0.588637 |
| 5             | 1             | 0           | 4.290409                | -3.960956 | -1.025364 |
| 6             | 1             | 0           | 3.307799                | -2.819432 | -2.006790 |
| 7             | 6             | 0           | 3.048701                | -3.864691 | 1.523543  |

|    |    |   |           |           |           |
|----|----|---|-----------|-----------|-----------|
| 8  | 1  | 0 | 2.265068  | -4.096019 | 2.246698  |
| 9  | 1  | 0 | 3.661123  | -4.746339 | 1.324579  |
| 10 | 1  | 0 | 3.652302  | -3.029436 | 1.881607  |
| 11 | 7  | 0 | -0.063757 | 1.151950  | 0.339375  |
| 12 | 6  | 0 | 0.716347  | 2.047107  | -0.248699 |
| 13 | 6  | 0 | -1.164091 | 1.817299  | 0.838229  |
| 14 | 1  | 0 | 1.654410  | 1.834362  | -0.734842 |
| 15 | 1  | 0 | -1.943768 | 1.291363  | 1.363610  |
| 16 | 1  | 0 | 0.545709  | 4.115979  | -0.508951 |
| 17 | 1  | 0 | -1.665397 | 3.988416  | 0.747175  |
| 18 | 76 | 0 | 0.310536  | -0.824261 | 0.471481  |
| 19 | 8  | 0 | -0.414166 | -3.638564 | 1.074257  |
| 20 | 1  | 0 | -0.055596 | -4.194226 | 0.358431  |
| 21 | 17 | 0 | 2.591605  | -0.313539 | 1.154437  |
| 22 | 7  | 0 | 0.152600  | 3.260280  | -0.142734 |
| 23 | 6  | 0 | -1.034169 | 3.141238  | 0.538241  |
| 24 | 17 | 0 | 1.011776  | -0.837996 | -1.861480 |
| 25 | 1  | 0 | -1.224998 | -3.240623 | 0.728276  |
| 26 | 17 | 0 | -0.385640 | -0.831587 | 2.790238  |
| 27 | 17 | 0 | -1.984625 | -1.282609 | -0.230388 |

-----

**PC-1<sub>A</sub>**

| Center<br>Number | Atomic<br>Number | Atomic<br>Type | Coordinates (Angstroms) |           |           |
|------------------|------------------|----------------|-------------------------|-----------|-----------|
|                  |                  |                | X                       | Y         | Z         |
| 1                | 17               | 0              | -1.960852               | 0.835894  | -0.194541 |
| 2                | 17               | 0              | 0.136863                | 1.582539  | -2.802664 |
| 3                | 7                | 0              | 0.746541                | 2.468017  | 0.339264  |
| 4                | 6                | 0              | 1.567257                | 2.758342  | 1.408263  |
| 5                | 6                | 0              | 0.175074                | 3.601861  | -0.037900 |
| 6                | 1                | 0              | 2.140463                | 1.985818  | 1.893624  |
| 7                | 1                | 0              | -0.521420               | 3.706698  | -0.855145 |
| 8                | 1                | 0              | 1.956240                | 4.712737  | 2.414144  |
| 9                | 1                | 0              | 0.305889                | 5.566908  | 0.674338  |
| 10               | 7                | 0              | 0.595747                | 4.602235  | 0.751503  |
| 11               | 6                | 0              | 1.480628                | 4.093370  | 1.672396  |
| 12               | 76               | 0              | 0.438451                | 0.633003  | -0.553453 |
| 13               | 8                | 0              | 0.128887                | -1.253447 | -1.515003 |
| 14               | 1                | 0              | -0.261639               | -1.077929 | -2.382713 |
| 15               | 1                | 0              | -0.489776               | -1.906576 | -1.007919 |
| 16               | 16               | 0              | -2.740719               | -2.522364 | 0.059595  |
| 17               | 8                | 0              | -1.284394               | -2.906339 | -0.282257 |
| 18               | 6                | 0              | -2.704813               | -2.025354 | 1.785346  |
| 19               | 1                | 0              | -3.726277               | -1.823917 | 2.113711  |
| 20               | 1                | 0              | -2.250895               | -2.824244 | 2.375210  |
| 21               | 1                | 0              | -2.097187               | -1.120209 | 1.827389  |
| 22               | 6                | 0              | -3.552565               | -4.113562 | 0.263474  |
| 23               | 1                | 0              | -3.629027               | -4.572535 | -0.722036 |
| 24               | 1                | 0              | -2.946891               | -4.732612 | 0.927453  |
| 25               | 1                | 0              | -4.548587               | -3.950874 | 0.678437  |
| 26               | 17               | 0              | 2.832185                | 0.431530  | -0.935967 |
| 27               | 17               | 0              | 0.687049                | -0.442401 | 1.643975  |

-----

**RC-1<sub>B</sub>**

| Center<br>Number | Atomic<br>Number | Atomic<br>Type | Coordinates (Angstroms) |           |           |
|------------------|------------------|----------------|-------------------------|-----------|-----------|
|                  |                  |                | X                       | Y         | Z         |
| 1                | 17               | 0              | -1.609052               | 0.299773  | -0.610436 |
| 2                | 17               | 0              | 1.185208                | 0.090065  | -2.579681 |
| 3                | 17               | 0              | 0.394576                | 0.303962  | 2.212810  |
| 4                | 17               | 0              | 3.171169                | 0.096796  | 0.220385  |
| 5                | 16               | 0              | 0.606246                | -2.200716 | -0.093189 |
| 6                | 8                | 0              | 1.831374                | -3.024249 | 0.163365  |
| 7                | 6                | 0              | -0.644151               | -2.683799 | 1.097953  |
| 8                | 1                | 0              | -1.561708               | -2.138969 | 0.868968  |
| 9                | 1                | 0              | -0.781208               | -3.763381 | 1.019881  |
| 10               | 1                | 0              | -0.274169               | -2.400416 | 2.082478  |
| 11               | 6                | 0              | -0.168367               | -2.811328 | -1.590492 |
| 12               | 1                | 0              | 0.529364                | -2.632748 | -2.407607 |
| 13               | 1                | 0              | -0.357861               | -3.877671 | -1.458633 |
| 14               | 1                | 0              | -1.090609               | -2.250286 | -1.751462 |
| 15               | 7                | 0              | 0.898777                | 2.223233  | -0.243228 |
| 16               | 6                | 0              | 1.582451                | 3.039604  | 0.630337  |
| 17               | 6                | 0              | 0.372113                | 2.999476  | -1.174737 |
| 18               | 1                | 0              | 2.104273                | 2.633596  | 1.481795  |
| 19               | 1                | 0              | -0.222600               | 2.662006  | -2.009193 |
| 20               | 1                | 0              | 1.833867                | 5.257952  | 0.607511  |
| 21               | 1                | 0              | 0.404511                | 5.069533  | -1.490356 |
| 22               | 7                | 0              | 0.686725                | 4.280426  | -0.926420 |
| 23               | 6                | 0              | 1.456789                | 4.331025  | 0.208946  |
| 24               | 76               | 0              | 0.776636                | 0.138627  | -0.174652 |
| 25               | 8                | 0              | 3.362086                | 2.530581  | -2.056528 |
| 26               | 1                | 0              | 3.450133                | 2.145434  | -1.173631 |
| 27               | 1                | 0              | 2.678974                | 1.965815  | -2.444797 |

### TS-1<sub>B</sub>

| Center<br>Number | Atomic<br>Number | Atomic<br>Type | Coordinates (Angstroms) |           |           |
|------------------|------------------|----------------|-------------------------|-----------|-----------|
|                  |                  |                | X                       | Y         | Z         |
| 1                | 17               | 0              | -1.492384               | 0.410650  | 0.636766  |
| 2                | 17               | 0              | 0.044468                | 0.167836  | -2.224986 |
| 3                | 17               | 0              | 1.107675                | 0.542509  | 2.565312  |
| 4                | 17               | 0              | 3.607668                | -0.399461 | 0.689578  |
| 5                | 16               | 0              | 0.869146                | -2.033078 | 0.042117  |
| 6                | 8                | 0              | 1.735014                | -2.686795 | -0.991687 |
| 7                | 6                | 0              | 1.239697                | -2.748897 | 1.641543  |
| 8                | 1                | 0              | 0.528394                | -2.351199 | 2.366772  |
| 9                | 1                | 0              | 1.167201                | -3.834183 | 1.551059  |
| 10               | 1                | 0              | 2.251052                | -2.429383 | 1.892957  |
| 11               | 6                | 0              | -0.789964               | -2.669707 | -0.203403 |
| 12               | 1                | 0              | -1.160976               | -2.228177 | -1.128884 |
| 13               | 1                | 0              | -0.703633               | -3.754057 | -0.289436 |
| 14               | 1                | 0              | -1.423153               | -2.377367 | 0.633441  |
| 15               | 7                | 0              | 0.805735                | 2.430751  | 0.140523  |
| 16               | 6                | 0              | 1.724357                | 3.267281  | 0.731105  |
| 17               | 6                | 0              | -0.073445               | 3.190627  | -0.487999 |
| 18               | 1                | 0              | 2.547950                | 2.874586  | 1.305922  |
| 19               | 1                | 0              | -0.918728               | 2.833417  | -1.055449 |
| 20               | 1                | 0              | 1.834132                | 5.497540  | 0.722278  |
| 21               | 1                | 0              | -0.270328               | 5.266876  | -0.694924 |
| 22               | 7                | 0              | 0.246691                | 4.484745  | -0.319025 |

|    |    |   |          |          |           |
|----|----|---|----------|----------|-----------|
| 23 | 6  | 0 | 1.383373 | 4.557866 | 0.450188  |
| 24 | 76 | 0 | 0.843903 | 0.346261 | 0.139574  |
| 25 | 8  | 0 | 2.652555 | 1.176483 | -1.495526 |
| 26 | 1  | 0 | 3.384466 | 0.638793 | -1.146071 |
| 27 | 1  | 0 | 2.336141 | 0.735300 | -2.296258 |

---

### PC-1<sub>B</sub>

| Center<br>Number | Atomic<br>Number | Atomic<br>Type | Coordinates (Angstroms) |           |           |
|------------------|------------------|----------------|-------------------------|-----------|-----------|
|                  |                  |                | X                       | Y         | Z         |
| 1                | 17               | 0              | -1.823092               | 0.418571  | -0.101959 |
| 2                | 17               | 0              | 0.743248                | 0.369015  | -2.434000 |
| 3                | 17               | 0              | 0.595257                | 0.166492  | 2.393126  |
| 4                | 16               | 0              | 0.511955                | -2.099275 | -0.109406 |
| 5                | 8                | 0              | 1.903041                | -2.683969 | -0.034873 |
| 6                | 6                | 0              | -0.490554               | -2.821354 | 1.183001  |
| 7                | 1                | 0              | -1.491155               | -2.391261 | 1.103910  |
| 8                | 1                | 0              | -0.502402               | -3.903732 | 1.049224  |
| 9                | 1                | 0              | -0.032454               | -2.538254 | 2.130044  |
| 10               | 6                | 0              | -0.309983               | -2.728959 | -1.566305 |
| 11               | 1                | 0              | 0.266886                | -2.389409 | -2.425649 |
| 12               | 1                | 0              | -0.336961               | -3.817507 | -1.504659 |
| 13               | 1                | 0              | -1.313957               | -2.299446 | -1.591100 |
| 14               | 7                | 0              | 0.746376                | 2.297586  | 0.051980  |
| 15               | 6                | 0              | 1.563322                | 3.053063  | 0.866035  |
| 16               | 6                | 0              | 0.056849                | 3.137385  | -0.703561 |
| 17               | 1                | 0              | 2.243855                | 2.593217  | 1.568378  |
| 18               | 1                | 0              | -0.671722               | 2.856275  | -1.447482 |
| 19               | 1                | 0              | 1.787497                | 5.271207  | 0.989557  |
| 20               | 1                | 0              | 0.016197                | 5.226456  | -0.838399 |
| 21               | 7                | 0              | 0.400565                | 4.399447  | -0.403673 |
| 22               | 6                | 0              | 1.354334                | 4.371928  | 0.584925  |
| 23               | 76               | 0              | 0.577958                | 0.215721  | -0.023921 |
| 24               | 8                | 0              | 2.652683                | -0.026274 | 0.015914  |
| 25               | 17               | 0              | 4.524334                | 1.218824  | 1.890713  |
| 26               | 1                | 0              | 2.841868                | -0.985955 | 0.072796  |
| 27               | 1                | 0              | 3.230665                | 0.455962  | 0.696977  |

---

### RC-2

| Center<br>Number | Atomic<br>Number | Atomic<br>Type | Coordinates (Angstroms) |          |           |
|------------------|------------------|----------------|-------------------------|----------|-----------|
|                  |                  |                | X                       | Y        | Z         |
| 1                | 17               | 0              | -1.821579               | 0.491814 | -0.625749 |
| 2                | 17               | 0              | 0.929841                | 0.436295 | -2.687800 |
| 3                | 17               | 0              | 0.237035                | 0.165828 | 2.123497  |
| 4                | 17               | 0              | 2.995703                | 0.186106 | 0.072665  |
| 5                | 7                | 0              | 0.661381                | 2.406117 | -0.170538 |
| 6                | 6                | 0              | 1.358304                | 3.155783 | 0.752534  |
| 7                | 6                | 0              | 0.060404                | 3.252113 | -0.991570 |
| 8                | 1                | 0              | 1.934136                | 2.683585 | 1.531993  |
| 9                | 1                | 0              | -0.562277               | 2.975886 | -1.827553 |
| 10               | 1                | 0              | 1.531021                | 5.373667 | 0.948251  |
| 11               | 1                | 0              | 0.009151                | 5.344510 | -1.091037 |



|    |    |   |          |           |           |
|----|----|---|----------|-----------|-----------|
| 12 | 7  | 0 | 0.346448 | 4.513320  | -0.626743 |
| 13 | 6  | 0 | 1.166328 | 4.477829  | 0.474455  |
| 14 | 76 | 0 | 0.573228 | 0.356011  | -0.268588 |
| 15 | 8  | 0 | 2.501095 | -2.244698 | -1.932116 |
| 16 | 8  | 0 | 0.457623 | -1.831438 | -0.344977 |
| 17 | 1  | 0 | 0.598229 | -2.174518 | 0.548775  |
| 18 | 1  | 0 | 1.216968 | -2.151709 | -0.910749 |
| 19 | 1  | 0 | 3.098901 | -1.693828 | -1.399240 |
| 20 | 1  | 0 | 2.166524 | -1.614844 | -2.592741 |

## TS-2

| Center<br>Number | Atomic<br>Number | Atomic<br>Type | Coordinates (Angstroms) |           |           |
|------------------|------------------|----------------|-------------------------|-----------|-----------|
|                  |                  |                | X                       | Y         | Z         |
| 1                | 17               | 0              | -1.729865               | 0.554059  | -0.184234 |
| 2                | 17               | 0              | 0.614859                | 0.270561  | -2.656836 |
| 3                | 17               | 0              | 0.553020                | 0.009893  | 2.267239  |
| 4                | 17               | 0              | 3.549192                | 0.930938  | 0.494909  |
| 5                | 7                | 0              | 0.792069                | 2.289263  | -0.209513 |
| 6                | 6                | 0              | 1.158850                | 3.082075  | 0.859093  |
| 7                | 6                | 0              | 0.432252                | 3.099367  | -1.195607 |
| 8                | 1                | 0              | 1.498983                | 2.644129  | 1.782446  |
| 9                | 1                | 0              | 0.080693                | 2.785459  | -2.164491 |
| 10               | 1                | 0              | 1.210563                | 5.305392  | 1.029210  |
| 11               | 1                | 0              | 0.359757                | 5.181100  | -1.370075 |
| 12               | 7                | 0              | 0.565499                | 4.372462  | -0.800373 |
| 13               | 6                | 0              | 1.023127                | 4.388048  | 0.497139  |
| 14               | 76               | 0              | 0.613662                | 0.237317  | -0.173945 |
| 15               | 8                | 0              | 2.464864                | -1.330204 | -0.923263 |
| 16               | 8                | 0              | 0.120282                | -1.909551 | -0.034739 |
| 17               | 1                | 0              | -0.036686               | -2.074172 | 0.909675  |
| 18               | 1                | 0              | 0.957918                | -2.350530 | -0.260328 |
| 19               | 1                | 0              | 3.184944                | -0.797935 | -0.518061 |
| 20               | 1                | 0              | 2.444823                | -1.095799 | -1.864180 |

## PC-2

| Center<br>Number | Atomic<br>Number | Atomic<br>Type | Coordinates (Angstroms) |           |           |
|------------------|------------------|----------------|-------------------------|-----------|-----------|
|                  |                  |                | X                       | Y         | Z         |
| 1                | 17               | 0              | -1.704343               | 0.178594  | -0.371942 |
| 2                | 17               | 0              | 1.120568                | 0.225389  | -2.391358 |
| 3                | 17               | 0              | 0.442285                | -0.267659 | 2.413502  |
| 4                | 7                | 0              | 0.801017                | 2.136608  | 0.154191  |
| 5                | 6                | 0              | 1.256444                | 2.851801  | 1.243123  |
| 6                | 6                | 0              | 0.450678                | 3.011973  | -0.778188 |
| 7                | 1                | 0              | 1.597434                | 2.355664  | 2.137735  |
| 8                | 1                | 0              | 0.053360                | 2.764089  | -1.749575 |
| 9                | 1                | 0              | 1.434063                | 5.057969  | 1.518273  |
| 10               | 1                | 0              | 0.475871                | 5.100938  | -0.840537 |
| 11               | 7                | 0              | 0.666751                | 4.253335  | -0.324231 |
| 12               | 6                | 0              | 1.178112                | 4.179912  | 0.949780  |
| 13               | 76               | 0              | 0.672874                | 0.102761  | 0.007685  |

|    |    |   |           |           |           |
|----|----|---|-----------|-----------|-----------|
| 14 | 8  | 0 | 2.718573  | -0.055485 | 0.345520  |
| 15 | 17 | 0 | 4.486676  | 2.081008  | -0.540135 |
| 16 | 1  | 0 | 2.923749  | -0.256704 | 1.271139  |
| 17 | 1  | 0 | 3.314668  | 0.710740  | 0.032172  |
| 18 | 8  | 0 | 0.607190  | -2.066139 | -0.117277 |
| 19 | 1  | 0 | -0.008902 | -2.388103 | -0.791735 |
| 20 | 1  | 0 | 0.312647  | -2.425361 | 0.734847  |

### RC-2<sub>A</sub>

| Center<br>Number | Atomic<br>Number | Atomic<br>Type | Coordinates (Angstroms) |           |           |
|------------------|------------------|----------------|-------------------------|-----------|-----------|
|                  |                  |                | X                       | Y         | Z         |
| 1                | 17               | 0              | -1.779591               | 0.458103  | -0.524368 |
| 2                | 17               | 0              | 1.065843                | 0.586681  | -2.590601 |
| 3                | 17               | 0              | 0.515529                | 0.200716  | 2.173007  |
| 4                | 16               | 0              | 0.485921                | -1.981040 | -0.421597 |
| 5                | 8                | 0              | 1.773100                | -2.763150 | -0.279996 |
| 6                | 6                | 0              | -0.689851               | -2.661075 | 0.741024  |
| 7                | 1                | 0              | -1.646036               | -2.155310 | 0.595547  |
| 8                | 1                | 0              | -0.763329               | -3.733566 | 0.555386  |
| 9                | 1                | 0              | -0.300688               | -2.457419 | 1.738465  |
| 10               | 6                | 0              | -0.258969               | -2.466804 | -1.973262 |
| 11               | 1                | 0              | 0.418629                | -2.147708 | -2.764279 |
| 12               | 1                | 0              | -0.379365               | -3.550681 | -1.962635 |
| 13               | 1                | 0              | -1.217050               | -1.950758 | -2.060356 |
| 14               | 7                | 0              | 0.690060                | 2.424257  | -0.080086 |
| 15               | 6                | 0              | 1.507030                | 3.141233  | 0.766296  |
| 16               | 6                | 0              | 0.002236                | 3.296167  | -0.799093 |
| 17               | 1                | 0              | 2.171955                | 2.646077  | 1.455071  |
| 18               | 1                | 0              | -0.726737               | 3.051217  | -1.555607 |
| 19               | 1                | 0              | 1.730267                | 5.350680  | 0.993728  |
| 20               | 1                | 0              | -0.035537               | 5.389324  | -0.839666 |
| 21               | 7                | 0              | 0.347087                | 4.542930  | -0.441754 |
| 22               | 6                | 0              | 1.298479                | 4.471114  | 0.546702  |
| 23               | 76               | 0              | 0.596575                | 0.352246  | -0.240066 |
| 24               | 8                | 0              | 3.266849                | -1.466968 | 1.555863  |
| 25               | 1                | 0              | 2.668784                | -1.286697 | 2.296816  |
| 26               | 1                | 0              | 2.813843                | -2.156668 | 1.022175  |
| 27               | 8                | 0              | 2.707667                | 0.436669  | 0.010360  |
| 28               | 1                | 0              | 3.039712                | -0.317378 | 0.629584  |
| 29               | 1                | 0              | 3.150393                | 0.357284  | -0.848009 |

### TS-2<sub>A</sub>

| Center<br>Number | Atomic<br>Number | Atomic<br>Type | Coordinates (Angstroms) |           |           |
|------------------|------------------|----------------|-------------------------|-----------|-----------|
|                  |                  |                | X                       | Y         | Z         |
| 1                | 16               | 0              | 2.050219                | -3.531661 | 0.830920  |
| 2                | 8                | 0              | 1.240028                | -4.726170 | 1.356289  |
| 3                | 6                | 0              | 3.007121                | -4.143085 | -0.563045 |
| 4                | 1                | 0              | 3.681685                | -3.351840 | -0.893117 |
| 5                | 1                | 0              | 3.557251                | -5.034330 | -0.255633 |
| 6                | 1                | 0              | 2.299594                | -4.384352 | -1.356985 |
| 7                | 6                | 0              | 3.394734                | -3.263240 | 1.989496  |
| 8                | 1                | 0              | 2.942636                | -2.959913 | 2.933459  |
| 9                | 1                | 0              | 3.964984                | -4.186671 | 2.103643  |

|    |    |   |           |           |           |
|----|----|---|-----------|-----------|-----------|
| 10 | 1  | 0 | 4.018420  | -2.455641 | 1.600832  |
| 11 | 7  | 0 | -0.028805 | 1.138682  | 0.423593  |
| 12 | 6  | 0 | 0.842596  | 2.049916  | 0.832127  |
| 13 | 6  | 0 | -1.164362 | 1.799640  | 0.000755  |
| 14 | 1  | 0 | 1.826444  | 1.845912  | 1.222718  |
| 15 | 1  | 0 | -2.016637 | 1.263762  | -0.384835 |
| 16 | 1  | 0 | 0.761935  | 4.137233  | 0.920474  |
| 17 | 1  | 0 | -1.587579 | 3.987792  | -0.048037 |
| 18 | 76 | 0 | 0.228528  | -0.856325 | 0.448856  |
| 19 | 8  | 0 | -0.904059 | -3.398531 | 0.645341  |
| 20 | 1  | 0 | -0.253913 | -4.074513 | 0.976931  |
| 21 | 8  | 0 | -1.706739 | -1.080433 | 1.308486  |
| 22 | 17 | 0 | 1.023686  | -0.706227 | 2.726608  |
| 23 | 1  | 0 | -1.758788 | -0.731143 | 2.211166  |
| 24 | 1  | 0 | -1.803809 | -2.060441 | 1.340463  |
| 25 | 7  | 0 | 0.303016  | 3.268590  | 0.683189  |
| 26 | 6  | 0 | -0.960324 | 3.137929  | 0.161986  |
| 27 | 17 | 0 | 2.413388  | -0.567464 | -0.500094 |
| 28 | 1  | 0 | -1.041331 | -3.558717 | -0.297524 |
| 29 | 17 | 0 | -0.826202 | -1.148716 | -1.692576 |

-----

**PC-2<sub>A</sub>**

| Center<br>Number | Atomic<br>Number | Atomic<br>Type | Coordinates (Angstroms) |           |           |
|------------------|------------------|----------------|-------------------------|-----------|-----------|
|                  |                  |                | X                       | Y         | Z         |
| 1                | 17               | 0              | -1.675222               | 2.317627  | -2.169821 |
| 2                | 17               | 0              | 1.732690                | 1.910618  | -2.717856 |
| 3                | 7                | 0              | 0.439391                | 2.310247  | 0.268584  |
| 4                | 6                | 0              | 0.313594                | 2.129882  | 1.632824  |
| 5                | 6                | 0              | 0.902556                | 3.539849  | 0.073694  |
| 6                | 1                | 0              | -0.052507               | 1.202647  | 2.042405  |
| 7                | 1                | 0              | 1.112865                | 3.981579  | -0.887757 |
| 8                | 1                | 0              | 0.765024                | 3.542314  | 3.298404  |
| 9                | 1                | 0              | 1.409191                | 5.088904  | 1.379864  |
| 10               | 7                | 0              | 1.069381                | 4.145088  | 1.254280  |
| 11               | 6                | 0              | 0.709129                | 3.273708  | 2.256932  |
| 12               | 76               | 0              | 0.040437                | 0.950187  | -1.222381 |
| 13               | 8                | 0              | -0.183247               | -0.524542 | -2.689134 |
| 14               | 1                | 0              | 0.154634                | -0.220827 | -3.544233 |
| 15               | 1                | 0              | -1.157065               | -0.904468 | -2.809719 |
| 16               | 16               | 0              | -2.897104               | -2.584531 | -2.063275 |
| 17               | 8                | 0              | -2.473164               | -1.388693 | -2.950123 |
| 18               | 6                | 0              | -1.364116               | -3.382186 | -1.558279 |
| 19               | 1                | 0              | -1.612864               | -4.322176 | -1.062937 |
| 20               | 1                | 0              | -0.745764               | -3.554327 | -2.441482 |
| 21               | 1                | 0              | -0.873228               | -2.703828 | -0.859947 |
| 22               | 6                | 0              | -3.446117               | -3.819275 | -3.250559 |
| 23               | 1                | 0              | -4.350963               | -3.434176 | -3.720405 |
| 24               | 1                | 0              | -2.662841               | -3.969064 | -3.995293 |
| 25               | 1                | 0              | -3.668187               | -4.745446 | -2.718106 |
| 26               | 17               | 0              | -1.500847               | -0.291530 | 0.243905  |
| 27               | 8                | 0              | 1.544654                | -0.288373 | -0.385510 |
| 28               | 1                | 0              | 1.180187                | -1.043559 | 0.102696  |
| 29               | 1                | 0              | 2.216567                | -0.610470 | -1.005225 |

-----

**RC-2<sub>B</sub>**

| Center<br>Number | Atomic<br>Number | Atomic<br>Type | Coordinates (Angstroms) |           |           |
|------------------|------------------|----------------|-------------------------|-----------|-----------|
|                  |                  |                | X                       | Y         | Z         |
| 1                | 17               | 0              | -1.472912               | 0.492489  | 0.524069  |
| 2                | 17               | 0              | 0.265634                | 0.229124  | -2.493457 |
| 3                | 17               | 0              | 1.654803                | 0.641418  | 2.093604  |
| 4                | 16               | 0              | 0.910418                | -1.935258 | 0.042258  |
| 5                | 8                | 0              | 2.295903                | -2.416485 | -0.328162 |
| 6                | 6                | 0              | 0.492914                | -2.535302 | 1.672122  |
| 7                | 1                | 0              | -0.508754               | -2.169784 | 1.909213  |
| 8                | 1                | 0              | 0.534576                | -3.624981 | 1.663336  |
| 9                | 1                | 0              | 1.222794                | -2.110734 | 2.360212  |
| 10               | 6                | 0              | -0.295407               | -2.784113 | -0.965818 |
| 11               | 1                | 0              | -0.084443               | -2.514513 | -2.000106 |
| 12               | 1                | 0              | -0.191715               | -3.857325 | -0.801139 |
| 13               | 1                | 0              | -1.284061               | -2.423481 | -0.673915 |
| 14               | 7                | 0              | 0.904841                | 2.443173  | -0.374942 |
| 15               | 6                | 0              | 1.931005                | 3.270582  | 0.027709  |
| 16               | 6                | 0              | -0.043347               | 3.210341  | -0.886767 |
| 17               | 1                | 0              | 2.822699                | 2.877428  | 0.489818  |
| 18               | 1                | 0              | -0.982244               | 2.862176  | -1.288064 |
| 19               | 1                | 0              | 2.098146                | 5.492797  | -0.101302 |
| 20               | 1                | 0              | -0.207456               | 5.279054  | -1.154756 |
| 21               | 7                | 0              | 0.339604                | 4.493742  | -0.830275 |
| 22               | 6                | 0              | 1.583280                | 4.559181  | -0.253679 |
| 23               | 76               | 0              | 0.817582                | 0.375117  | -0.153634 |
| 24               | 8                | 0              | 2.856140                | 0.211123  | -0.755388 |
| 25               | 1                | 0              | 3.060333                | -0.754203 | -0.766851 |
| 26               | 1                | 0              | 3.031791                | 0.568729  | -1.639751 |
| 27               | 8                | 0              | -0.499127               | 3.218338  | 2.232749  |
| 28               | 1                | 0              | 0.379073                | 2.817044  | 2.271403  |
| 29               | 1                | 0              | -1.001945               | 2.560486  | 1.733368  |

**TS-2<sub>B</sub>**

| Center<br>Number | Atomic<br>Number | Atomic<br>Type | Coordinates (Angstroms) |           |           |
|------------------|------------------|----------------|-------------------------|-----------|-----------|
|                  |                  |                | X                       | Y         | Z         |
| 1                | 17               | 0              | -1.700410               | 0.416783  | -1.057069 |
| 2                | 17               | 0              | 1.331926                | 0.328226  | -2.290967 |
| 3                | 17               | 0              | 1.076755                | 0.049639  | 2.639724  |
| 4                | 16               | 0              | 0.532713                | -1.927470 | -0.023946 |
| 5                | 8                | 0              | 1.949819                | -2.418897 | 0.159237  |
| 6                | 6                | 0              | -0.523448               | -2.649589 | 1.224329  |
| 7                | 1                | 0              | -1.539236               | -2.293628 | 1.038083  |
| 8                | 1                | 0              | -0.460539               | -3.736065 | 1.148786  |
| 9                | 1                | 0              | -0.160220               | -2.288082 | 2.185569  |
| 10               | 6                | 0              | -0.138758               | -2.666463 | -1.506397 |
| 11               | 1                | 0              | 0.465997                | -2.307123 | -2.338376 |
| 12               | 1                | 0              | -0.071471               | -3.750154 | -1.402563 |
| 13               | 1                | 0              | -1.170896               | -2.329342 | -1.613612 |
| 14               | 7                | 0              | 0.707529                | 2.481550  | -0.091373 |
| 15               | 6                | 0              | 1.179134                | 3.273168  | 0.932436  |
| 16               | 6                | 0              | 0.367482                | 3.282478  | -1.087280 |
| 17               | 1                | 0              | 1.502202                | 2.844918  | 1.869206  |
| 18               | 1                | 0              | -0.042034               | 2.965968  | -2.033838 |

|    |    |   |           |           |           |
|----|----|---|-----------|-----------|-----------|
| 19 | 1  | 0 | 1.394132  | 5.492571  | 1.030688  |
| 20 | 1  | 0 | 0.434620  | 5.362240  | -1.324307 |
| 21 | 7  | 0 | 0.607575  | 4.556490  | -0.739421 |
| 22 | 6  | 0 | 1.122805  | 4.576284  | 0.533902  |
| 23 | 76 | 0 | 0.521735  | 0.412967  | -0.057135 |
| 24 | 8  | 0 | -1.265605 | 1.347646  | 1.616425  |
| 25 | 1  | 0 | -1.026831 | 0.930377  | 2.456311  |
| 26 | 1  | 0 | -2.073707 | 0.916490  | 1.307683  |
| 27 | 8  | 0 | 2.681084  | 0.280595  | 0.294495  |
| 28 | 1  | 0 | 2.816865  | 0.455919  | 1.243639  |
| 29 | 1  | 0 | 2.845420  | -0.685167 | 0.199322  |

### PC-2<sub>B</sub>

| Center<br>Number | Atomic<br>Number | Atomic<br>Type | Coordinates (Angstroms) |           |           |
|------------------|------------------|----------------|-------------------------|-----------|-----------|
|                  |                  |                | X                       | Y         | Z         |
| 1                | 17               | 0              | -1.376694               | 0.261117  | 1.166474  |
| 2                | 17               | 0              | -0.065169               | 0.250633  | -2.140152 |
| 3                | 16               | 0              | 0.898534                | -2.010218 | 0.083743  |
| 4                | 8                | 0              | 2.029222                | -2.578080 | -0.711534 |
| 5                | 6                | 0              | 0.948325                | -2.655518 | 1.753335  |
| 6                | 1                | 0              | 0.086304                | -2.262449 | 2.297338  |
| 7                | 1                | 0              | 0.917763                | -3.745103 | 1.700514  |
| 8                | 1                | 0              | 1.887837                | -2.318141 | 2.194245  |
| 9                | 6                | 0              | -0.632562               | -2.735817 | -0.496131 |
| 10               | 1                | 0              | -0.776361               | -2.392337 | -1.520457 |
| 11               | 1                | 0              | -0.519582               | -3.820151 | -0.454817 |
| 12               | 1                | 0              | -1.447188               | -2.389280 | 0.141492  |
| 13               | 7                | 0              | 0.660797                | 2.414344  | 0.061101  |
| 14               | 6                | 0              | 1.508759                | 3.274145  | 0.729785  |
| 15               | 6                | 0              | -0.222752               | 3.157677  | -0.586316 |
| 16               | 1                | 0              | 2.308116                | 2.908933  | 1.354561  |
| 17               | 1                | 0              | -1.024098               | 2.785910  | -1.205160 |
| 18               | 1                | 0              | 1.512448                | 5.504494  | 0.794075  |
| 19               | 1                | 0              | -0.501341               | 5.226265  | -0.738277 |
| 20               | 7                | 0              | 0.030255                | 4.454943  | -0.358171 |
| 21               | 6                | 0              | 1.120905                | 4.555379  | 0.468611  |
| 22               | 76               | 0              | 0.743411                | 0.323910  | 0.092693  |
| 23               | 8                | 0              | 2.718497                | 0.458136  | -0.608793 |
| 24               | 1                | 0              | 3.058532                | 1.357696  | -0.731769 |
| 25               | 8                | 0              | 1.614759                | 0.581025  | 2.033932  |
| 26               | 1                | 0              | 1.015085                | 0.447044  | 2.782782  |
| 27               | 1                | 0              | 2.458549                | 0.056163  | 2.163963  |
| 28               | 17               | 0              | 4.148366                | -0.839981 | 1.644510  |
| 29               | 1                | 0              | 3.360786                | -0.050723 | -0.031036 |

### RC-2<sub>C</sub>

| Center<br>Number | Atomic<br>Number | Atomic<br>Type | Coordinates (Angstroms) |           |           |
|------------------|------------------|----------------|-------------------------|-----------|-----------|
|                  |                  |                | X                       | Y         | Z         |
| 1                | 17               | 0              | -1.470682               | 0.110821  | 0.762402  |
| 2                | 17               | 0              | 0.106496                | 0.214379  | -2.341697 |
| 3                | 17               | 0              | 1.727038                | 0.326676  | 2.186045  |
| 4                | 16               | 0              | 1.023847                | -2.108714 | -0.055410 |
| 5                | 8                | 0              | 2.393502                | -2.466071 | -0.589696 |
| 6                | 6                | 0              | 0.796987                | -2.879676 | 1.538557  |
| 7                | 1                | 0              | -0.199837               | -2.612815 | 1.896849  |
| 8                | 1                | 0              | 0.907186                | -3.958274 | 1.419105  |
| 9                | 1                | 0              | 1.558241                | -2.468634 | 2.200492  |
| 10               | 6                | 0              | -0.223678               | -2.939392 | -1.026713 |
| 11               | 1                | 0              | -0.124405               | -2.570214 | -2.046836 |
| 12               | 1                | 0              | -0.050830               | -4.014689 | -0.968147 |
| 13               | 1                | 0              | -1.197819               | -2.663276 | -0.617098 |
| 14               | 7                | 0              | 0.729675                | 2.279550  | -0.069689 |
| 15               | 6                | 0              | 1.722227                | 3.136923  | 0.354052  |
| 16               | 6                | 0              | -0.289614               | 3.022325  | -0.468748 |
| 17               | 1                | 0              | 2.659836                | 2.766931  | 0.737628  |
| 18               | 1                | 0              | -1.225567               | 2.648121  | -0.853130 |
| 19               | 1                | 0              | 1.747541                | 5.368474  | 0.403721  |
| 20               | 1                | 0              | -0.594952               | 5.090569  | -0.550476 |
| 21               | 7                | 0              | 0.016023                | 4.319153  | -0.320796 |
| 22               | 6                | 0              | 1.281928                | 4.418893  | 0.199824  |
| 23               | 76               | 0              | 0.783660                | 0.198135  | -0.030180 |
| 24               | 8                | 0              | 2.788271                | 0.213386  | -0.756626 |
| 25               | 1                | 0              | 3.033126                | -0.733963 | -0.889255 |
| 26               | 1                | 0              | 2.889389                | 0.675693  | -1.603070 |
| 27               | 8                | 0              | -0.579879               | 2.721938  | 2.674022  |
| 28               | 1                | 0              | 0.318555                | 2.371561  | 2.609630  |
| 29               | 1                | 0              | -1.087950               | 2.076285  | 2.164481  |

### TS-2c

| Center<br>Number | Atomic<br>Number | Atomic<br>Type | Coordinates (Angstroms) |           |           |
|------------------|------------------|----------------|-------------------------|-----------|-----------|
|                  |                  |                | X                       | Y         | Z         |
| 1                | 17               | 0              | -1.846502               | 0.074618  | -1.608207 |
| 2                | 17               | 0              | 1.274721                | 0.430758  | -2.313744 |
| 3                | 17               | 0              | 0.655408                | 0.296353  | 2.468329  |
| 4                | 16               | 0              | 0.408042                | -1.975702 | 0.087516  |
| 5                | 8                | 0              | 1.734801                | -2.469586 | 0.625622  |
| 6                | 6                | 0              | -0.932611               | -2.577832 | 1.099997  |
| 7                | 1                | 0              | -1.857354               | -2.217703 | 0.642947  |
| 8                | 1                | 0              | -0.892728               | -3.666984 | 1.138859  |
| 9                | 1                | 0              | -0.796372               | -2.130075 | 2.084776  |
| 10               | 6                | 0              | 0.103997                | -2.793772 | -1.469536 |
| 11               | 1                | 0              | 0.891131                | -2.463264 | -2.147631 |
| 12               | 1                | 0              | 0.148164                | -3.870221 | -1.298110 |
| 13               | 1                | 0              | -0.870494               | -2.468979 | -1.835997 |
| 14               | 7                | 0              | 0.550648                | 2.418255  | -0.002405 |
| 15               | 6                | 0              | 1.286392                | 3.226003  | 0.837057  |
| 16               | 6                | 0              | -0.071282               | 3.204779  | -0.866763 |
| 17               | 1                | 0              | 1.879695                | 2.810530  | 1.636047  |
| 18               | 1                | 0              | -0.722681               | 2.866875  | -1.659298 |
| 19               | 1                | 0              | 1.482601                | 5.449917  | 0.855491  |
| 20               | 1                | 0              | -0.112360               | 5.282398  | -1.120985 |
| 21               | 7                | 0              | 0.236182                | 4.484596  | -0.607526 |
| 22               | 6                | 0              | 1.095064                | 4.524455  | 0.463761  |

|    |    |   |           |           |           |
|----|----|---|-----------|-----------|-----------|
| 23 | 76 | 0 | 0.426929  | 0.338887  | 0.004479  |
| 24 | 8  | 0 | 2.515589  | 0.123552  | 0.257205  |
| 25 | 1  | 0 | 2.934483  | 0.225195  | -0.617396 |
| 26 | 1  | 0 | 2.642182  | -0.816022 | 0.539149  |
| 27 | 8  | 0 | -1.705309 | 0.787294  | 1.058280  |
| 28 | 1  | 0 | -1.563263 | 1.510416  | 1.685020  |
| 29 | 1  | 0 | -2.312074 | 1.088591  | 0.364393  |

### PC-2<sub>C</sub>

| Center<br>Number | Atomic<br>Number | Atomic<br>Type | Coordinates (Angstroms) |           |           |
|------------------|------------------|----------------|-------------------------|-----------|-----------|
|                  |                  |                | X                       | Y         | Z         |
| 1                | 17               | 0              | 0.244315                | 0.275259  | -2.228488 |
| 2                | 17               | 0              | 0.870335                | 0.516713  | 2.532708  |
| 3                | 16               | 0              | 0.692917                | -1.986629 | 0.190615  |
| 4                | 8                | 0              | 2.065856                | -2.330229 | -0.362142 |
| 5                | 6                | 0              | 0.529653                | -2.770113 | 1.783390  |
| 6                | 1                | 0              | -0.482324               | -2.572069 | 2.146904  |
| 7                | 1                | 0              | 0.715547                | -3.836130 | 1.642887  |
| 8                | 1                | 0              | 1.276044                | -2.315929 | 2.434416  |
| 9                | 6                | 0              | -0.543014               | -2.836822 | -0.774920 |
| 10               | 1                | 0              | -0.504749               | -2.412203 | -1.777786 |
| 11               | 1                | 0              | -0.290713               | -3.898491 | -0.779225 |
| 12               | 1                | 0              | -1.509934               | -2.651574 | -0.298546 |
| 13               | 7                | 0              | 0.581875                | 2.443805  | 0.043935  |
| 14               | 6                | 0              | 1.375778                | 3.290997  | 0.789798  |
| 15               | 6                | 0              | -0.129647               | 3.196943  | -0.784904 |
| 16               | 1                | 0              | 2.046508                | 2.913038  | 1.544242  |
| 17               | 1                | 0              | -0.835592               | 2.832946  | -1.515322 |
| 18               | 1                | 0              | 1.533596                | 5.515102  | 0.724356  |
| 19               | 1                | 0              | -0.231286               | 5.262840  | -1.092912 |
| 20               | 7                | 0              | 0.177010                | 4.486515  | -0.590028 |
| 21               | 6                | 0              | 1.128687                | 4.572653  | 0.395877  |
| 22               | 76               | 0              | 0.520852                | 0.365406  | 0.164769  |
| 23               | 8                | 0              | 2.594763                | 0.210874  | -0.152197 |
| 24               | 1                | 0              | 2.772563                | -0.741923 | -0.382791 |
| 25               | 1                | 0              | 2.946261                | 0.784957  | -0.849107 |
| 26               | 8                | 0              | -1.503797               | 0.584343  | 0.425983  |
| 27               | 1                | 0              | -2.006027               | -0.167112 | 0.920922  |
| 28               | 1                | 0              | -1.758276               | 1.437380  | 0.809386  |
| 29               | 17               | 0              | -2.829905               | -1.570489 | 1.758532  |

### RC-3<sub>A</sub>

| Center<br>Number | Atomic<br>Number | Atomic<br>Type | Coordinates (Angstroms) |          |           |
|------------------|------------------|----------------|-------------------------|----------|-----------|
|                  |                  |                | X                       | Y        | Z         |
| 1                | 17               | 0              | -1.599061               | 0.121279 | 0.575851  |
| 2                | 17               | 0              | 0.332501                | 0.269356 | -2.360917 |
| 3                | 17               | 0              | 1.455546                | 0.120641 | 2.320856  |
| 4                | 7                | 0              | 0.687000                | 2.311176 | 0.050788  |
| 5                | 6                | 0              | 1.645213                | 3.133547 | 0.605781  |
| 6                | 6                | 0              | -0.286441               | 3.084649 | -0.404261 |
| 7                | 1                | 0              | 2.540983                | 2.731219 | 1.051633  |
| 8                | 1                | 0              | -1.187505               | 2.739356 | -0.886182 |

|    |    |   |           |           |           |
|----|----|---|-----------|-----------|-----------|
| 9  | 1  | 0 | 1.683268  | 5.358201  | 0.766237  |
| 10 | 1  | 0 | -0.561184 | 5.157988  | -0.415874 |
| 11 | 7  | 0 | 0.017750  | 4.368129  | -0.166518 |
| 12 | 6  | 0 | 1.231465  | 4.425846  | 0.471915  |
| 13 | 76 | 0 | 0.719478  | 0.273807  | 0.023234  |
| 14 | 8  | 0 | 2.794886  | 0.464528  | -0.476345 |
| 15 | 1  | 0 | 3.370711  | -0.295531 | -0.306887 |
| 16 | 1  | 0 | 2.926061  | 0.733986  | -1.399290 |
| 17 | 8  | 0 | -0.814041 | 2.588472  | 2.710941  |
| 18 | 1  | 0 | 0.066064  | 2.191903  | 2.754810  |
| 19 | 1  | 0 | -1.283615 | 1.979703  | 2.124413  |
| 20 | 8  | 0 | 0.759662  | -1.918105 | -0.002093 |
| 21 | 1  | 0 | 1.038922  | -2.318079 | -0.837837 |
| 22 | 1  | 0 | 1.303467  | -2.301574 | 0.701344  |

### TS-3<sub>A</sub>

| Center<br>Number | Atomic<br>Number | Atomic<br>Type | Coordinates (Angstroms) |           |           |
|------------------|------------------|----------------|-------------------------|-----------|-----------|
|                  |                  |                | X                       | Y         | Z         |
| 1                | 17               | 0              | -1.634580               | 0.320285  | -1.126004 |
| 2                | 17               | 0              | 1.618342                | 0.246046  | -2.169065 |
| 3                | 17               | 0              | 0.546431                | -0.606169 | 2.461866  |
| 4                | 7                | 0              | 0.736074                | 2.445249  | -0.097713 |
| 5                | 6                | 0              | 1.519405                | 3.233181  | 0.717599  |
| 6                | 6                | 0              | 0.071244                | 3.250275  | -0.912333 |
| 7                | 1                | 0              | 2.159748                | 2.803040  | 1.469320  |
| 8                | 1                | 0              | -0.634930               | 2.934798  | -1.664569 |
| 9                | 1                | 0              | 1.726482                | 5.453590  | 0.768145  |
| 10               | 1                | 0              | 0.038744                | 5.330252  | -1.134238 |
| 11               | 7                | 0              | 0.403015                | 4.522196  | -0.648803 |
| 12               | 6                | 0              | 1.315025                | 4.537726  | 0.378425  |
| 13               | 76               | 0              | 0.552709                | 0.409114  | -0.057405 |
| 14               | 8                | 0              | -1.234455               | 1.570694  | 1.574612  |
| 15               | 1                | 0              | -1.233948               | 0.897373  | 2.269536  |
| 16               | 1                | 0              | -1.985320               | 1.353180  | 1.003254  |
| 17               | 8                | 0              | 2.590381                | 0.516265  | 0.704176  |
| 18               | 1                | 0              | 2.662496                | -0.054947 | 1.488447  |
| 19               | 1                | 0              | 3.238819                | 0.220379  | 0.046323  |
| 20               | 8                | 0              | 0.419550                | -1.793618 | -0.206608 |
| 21               | 1                | 0              | 1.003672                | -2.144705 | -0.895044 |
| 22               | 1                | 0              | 0.681753                | -2.186461 | 0.642182  |

### PC-3<sub>A</sub>

| Center<br>Number | Atomic<br>Number | Atomic<br>Type | Coordinates (Angstroms) |          |           |
|------------------|------------------|----------------|-------------------------|----------|-----------|
|                  |                  |                | X                       | Y        | Z         |
| 1                | 17               | 0              | -1.368316               | 0.295742 | 1.370508  |
| 2                | 17               | 0              | -0.102343               | 0.110996 | -1.965124 |
| 3                | 7                | 0              | 0.648852                | 2.483176 | 0.145460  |
| 4                | 6                | 0              | 1.379367                | 3.377456 | 0.906339  |
| 5                | 6                | 0              | -0.100660               | 3.189574 | -0.695677 |
| 6                | 1                | 0              | 2.060110                | 3.035762 | 1.668756  |
| 7                | 1                | 0              | -0.780214               | 2.776199 | -1.424305 |
| 8                | 1                | 0              | 1.395733                | 5.604930 | 0.837987  |



|    |    |   |           |           |           |
|----|----|---|-----------|-----------|-----------|
| 9  | 1  | 0 | -0.322738 | 5.241104  | -1.004516 |
| 10 | 7  | 0 | 0.124193  | 4.490356  | -0.495024 |
| 11 | 6  | 0 | 1.056355  | 4.637810  | 0.507547  |
| 12 | 76 | 0 | 0.743028  | 0.457907  | 0.283632  |
| 13 | 8  | 0 | 2.659250  | 0.542114  | -0.589810 |
| 14 | 1  | 0 | 2.664087  | 0.280209  | -1.524459 |
| 15 | 8  | 0 | 1.612191  | 0.688900  | 2.251984  |
| 16 | 1  | 0 | 0.964718  | 0.473001  | 2.941194  |
| 17 | 1  | 0 | 2.376425  | 0.074223  | 2.348812  |
| 18 | 17 | 0 | 3.800848  | -1.310814 | 1.489306  |
| 19 | 1  | 0 | 3.311444  | -0.009581 | -0.086777 |
| 20 | 8  | 0 | 0.996371  | -1.658198 | 0.394716  |
| 21 | 1  | 0 | 1.896990  | -1.900027 | 0.719190  |
| 22 | 1  | 0 | 0.820178  | -2.114045 | -0.442450 |

### RC-3<sub>B</sub>

| Center<br>Number | Atomic<br>Number | Atomic<br>Type | Coordinates (Angstroms) |           |           |
|------------------|------------------|----------------|-------------------------|-----------|-----------|
|                  |                  |                | X                       | Y         | Z         |
| 1                | 17               | 0              | -1.599061               | 0.121279  | 0.575851  |
| 2                | 17               | 0              | 0.332501                | 0.269356  | -2.360917 |
| 3                | 17               | 0              | 1.455546                | 0.120641  | 2.320856  |
| 4                | 7                | 0              | 0.687000                | 2.311176  | 0.050788  |
| 5                | 6                | 0              | 1.645213                | 3.133547  | 0.605781  |
| 6                | 6                | 0              | -0.286441               | 3.084649  | -0.404261 |
| 7                | 1                | 0              | 2.540983                | 2.731219  | 1.051633  |
| 8                | 1                | 0              | -1.187505               | 2.739356  | -0.886182 |
| 9                | 1                | 0              | 1.683268                | 5.358201  | 0.766237  |
| 10               | 1                | 0              | -0.561184               | 5.157988  | -0.415874 |
| 11               | 7                | 0              | 0.017750                | 4.368129  | -0.166518 |
| 12               | 6                | 0              | 1.231465                | 4.425846  | 0.471915  |
| 13               | 76               | 0              | 0.719478                | 0.273807  | 0.023234  |
| 14               | 8                | 0              | 2.794886                | 0.464528  | -0.476345 |
| 15               | 1                | 0              | 3.370711                | -0.295531 | -0.306887 |
| 16               | 1                | 0              | 2.926061                | 0.733986  | -1.399290 |
| 17               | 8                | 0              | -0.814041               | 2.588472  | 2.710941  |
| 18               | 1                | 0              | 0.066064                | 2.191903  | 2.754810  |
| 19               | 1                | 0              | -1.283615               | 1.979703  | 2.124413  |
| 20               | 8                | 0              | 0.759662                | -1.918105 | -0.002093 |
| 21               | 1                | 0              | 1.038922                | -2.318079 | -0.837837 |
| 22               | 1                | 0              | 1.303467                | -2.301574 | 0.701344  |

### TS-3<sub>B</sub>

| Center<br>Number | Atomic<br>Number | Atomic<br>Type | Coordinates (Angstroms) |           |           |
|------------------|------------------|----------------|-------------------------|-----------|-----------|
|                  |                  |                | X                       | Y         | Z         |
| 1                | 17               | 0              | 1.726343                | 0.353294  | -2.016131 |
| 2                | 17               | 0              | -1.071475               | 0.319797  | 1.983976  |
| 3                | 7                | 0              | 0.560269                | 2.467122  | -0.076839 |
| 4                | 6                | 0              | 0.741776                | 3.179223  | 1.089953  |
| 5                | 6                | 0              | 0.698963                | 3.310644  | -1.086854 |
| 6                | 1                | 0              | 0.667881                | 2.702948  | 2.054765  |
| 7                | 1                | 0              | 0.611591                | 3.057180  | -2.131229 |
| 8                | 1                | 0              | 1.201653                | 5.344464  | 1.370185  |
| 9                | 1                | 0              | 1.111913                | 5.359320  | -1.173467 |
| 10               | 7                | 0              | 0.962517                | 4.534504  | -0.608649 |
| 11               | 6                | 0              | 0.998847                | 4.477765  | 0.763936  |
| 12               | 76               | 0              | 0.107387                | 0.470307  | -0.178032 |
| 13               | 8                | 0              | 1.834632                | 0.222566  | 0.958140  |
| 14               | 1                | 0              | 2.612340                | 0.149258  | 0.375382  |
| 15               | 1                | 0              | 1.827006                | -0.533960 | 1.566455  |
| 16               | 8                | 0              | -1.996486               | 1.807385  | -0.467848 |
| 17               | 17               | 0              | -1.576763               | -0.448239 | -2.196964 |
| 18               | 1                | 0              | -2.343331               | 1.772190  | 0.436356  |
| 19               | 1                | 0              | -2.532870               | 1.186501  | -0.986008 |
| 20               | 8                | 0              | -0.048053               | -1.715142 | -0.059077 |
| 21               | 1                | 0              | -0.522411               | -1.975783 | -0.871450 |
| 22               | 1                | 0              | -0.632409               | -1.937927 | 0.684311  |

### PC-3<sub>B</sub>

| Center<br>Number | Atomic<br>Number | Atomic<br>Type | Coordinates (Angstroms) |           |           |
|------------------|------------------|----------------|-------------------------|-----------|-----------|
|                  |                  |                | X                       | Y         | Z         |
| 1                | 17               | 0              | 0.342305                | 0.346466  | -2.353696 |
| 2                | 17               | 0              | 0.815519                | 0.450002  | 2.462063  |
| 3                | 7                | 0              | 0.600483                | 2.501616  | 0.002618  |
| 4                | 6                | 0              | 1.497322                | 3.337526  | 0.639453  |
| 5                | 6                | 0              | -0.257065               | 3.266488  | -0.665677 |
| 6                | 1                | 0              | 2.290768                | 2.946765  | 1.255855  |
| 7                | 1                | 0              | -1.076998               | 2.906296  | -1.267126 |
| 8                | 1                | 0              | 1.600850                | 5.563957  | 0.634234  |
| 9                | 1                | 0              | -0.436541               | 5.334423  | -0.876909 |
| 10               | 7                | 0              | 0.060184                | 4.549304  | -0.476897 |
| 11               | 6                | 0              | 1.164831                | 4.623271  | 0.342795  |
| 12               | 76               | 0              | 0.550426                | 0.471452  | 0.053863  |
| 13               | 8                | 0              | 2.667836                | 0.371396  | -0.112541 |
| 14               | 1                | 0              | 3.108091                | 0.062389  | 0.694663  |
| 15               | 1                | 0              | 2.994643                | -0.158258 | -0.855551 |
| 16               | 8                | 0              | -1.553575               | 0.611826  | 0.205129  |
| 17               | 1                | 0              | -1.984385               | -0.233567 | -0.119987 |
| 18               | 1                | 0              | -1.840712               | 0.736971  | 1.122953  |
| 19               | 17               | 0              | -2.360420               | -2.128392 | -0.600934 |
| 20               | 8                | 0              | 0.485207                | -1.657021 | 0.132580  |
| 21               | 1                | 0              | 0.709087                | -2.012194 | 1.006090  |
| 22               | 1                | 0              | -0.413100               | -2.010085 | -0.128752 |

### RC-3

| Center | Atomic | Atomic | Coordinates (Angstroms) |  |  |
|--------|--------|--------|-------------------------|--|--|
|--------|--------|--------|-------------------------|--|--|

| Number | Number | Type | X         | Y         | Z         |
|--------|--------|------|-----------|-----------|-----------|
| 1      | 17     | 0    | -1.385833 | 0.745481  | 1.724952  |
| 2      | 17     | 0    | -0.794506 | 0.556837  | -1.791074 |
| 3      | 16     | 0    | 0.604793  | -1.828771 | 0.380988  |
| 4      | 8      | 0    | 2.091192  | -2.019305 | 0.641905  |
| 5      | 6      | 0    | -0.316668 | -2.640008 | 1.676224  |
| 6      | 1      | 0    | -1.371506 | -2.585478 | 1.405295  |
| 7      | 1      | 0    | 0.037719  | -3.670338 | 1.733202  |
| 8      | 1      | 0    | -0.117337 | -2.101443 | 2.602860  |
| 9      | 6      | 0    | 0.143704  | -2.768621 | -1.064206 |
| 10     | 1      | 0    | 0.625653  | -2.300483 | -1.922802 |
| 11     | 1      | 0    | 0.498060  | -3.790107 | -0.917598 |
| 12     | 1      | 0    | -0.942537 | -2.719798 | -1.148208 |
| 13     | 7      | 0    | 0.606408  | 2.567520  | 0.151871  |
| 14     | 6      | 0    | 1.776139  | 3.280381  | 0.313878  |
| 15     | 6      | 0    | -0.367190 | 3.439710  | -0.059830 |
| 16     | 1      | 0    | 2.717075  | 2.787302  | 0.500196  |
| 17     | 1      | 0    | -1.404957 | 3.196612  | -0.225994 |
| 18     | 1      | 0    | 2.111261  | 5.485219  | 0.252994  |
| 19     | 1      | 0    | -0.396657 | 5.528074  | -0.174957 |
| 20     | 7      | 0    | 0.137965  | 4.680804  | -0.039118 |
| 21     | 6      | 0    | 1.488999  | 4.608156  | 0.195081  |
| 22     | 76     | 0    | 0.430160  | 0.506005  | 0.231238  |
| 23     | 8      | 0    | 2.283442  | 0.377606  | -0.826216 |
| 24     | 1      | 0    | 2.713557  | -0.490328 | -0.697296 |
| 25     | 1      | 0    | 2.294266  | 0.609066  | -1.767821 |
| 26     | 8      | 0    | 1.830349  | 0.524512  | 1.844177  |
| 27     | 1      | 0    | 1.533923  | 0.861325  | 2.703975  |
| 28     | 1      | 0    | 2.254504  | -0.347466 | 1.964157  |
| 29     | 8      | 0    | -2.689134 | -1.540312 | -0.192183 |
| 30     | 1      | 0    | -2.462573 | -0.983058 | -0.949838 |
| 31     | 1      | 0    | -2.733633 | -0.905603 | 0.536267  |

### TS-3

| Center Number | Atomic Number | Atomic Type | Coordinates (Angstroms) |           |           |
|---------------|---------------|-------------|-------------------------|-----------|-----------|
|               |               |             | X                       | Y         | Z         |
| 1             | 17            | 0           | -1.804321               | 0.121760  | -0.374877 |
| 2             | 16            | 0           | 1.299717                | -1.924987 | 2.359052  |
| 3             | 8             | 0           | 2.349706                | -1.185870 | 3.210659  |
| 4             | 6             | 0           | 0.149086                | -2.705201 | 3.483564  |
| 5             | 1             | 0           | -0.554177               | -3.287793 | 2.885823  |
| 6             | 1             | 0           | 0.706500                | -3.339285 | 4.174314  |
| 7             | 1             | 0           | -0.368992               | -1.901787 | 4.005824  |
| 8             | 6             | 0           | 2.129694                | -3.356774 | 1.669671  |
| 9             | 1             | 0           | 2.846297                | -2.984523 | 0.936539  |
| 10            | 1             | 0           | 2.640912                | -3.881437 | 2.478048  |
| 11            | 1             | 0           | 1.385530                | -3.989008 | 1.186017  |
| 12            | 7             | 0           | 0.336438                | 2.224734  | 0.239502  |
| 13            | 6             | 0           | 1.309652                | 2.953587  | -0.419227 |
| 14            | 6             | 0           | -0.640837               | 3.061307  | 0.578501  |
| 15            | 1             | 0           | 2.202688                | 2.493643  | -0.808379 |
| 16            | 1             | 0           | -1.538331               | 2.789277  | 1.110550  |
| 17            | 1             | 0           | 1.353905                | 5.128616  | -0.894729 |
| 18            | 1             | 0           | -0.898720               | 5.109475  | 0.292112  |
| 19            | 7             | 0           | -0.324519               | 4.286998  | 0.159358  |
| 20            | 6             | 0           | 0.898269                | 4.248984  | -0.472525 |

|    |    |   |           |           |           |
|----|----|---|-----------|-----------|-----------|
| 21 | 76 | 0 | 0.398463  | 0.261677  | 0.666106  |
| 22 | 8  | 0 | -0.069780 | -2.230785 | -0.049796 |
| 23 | 1  | 0 | 0.356501  | -2.588270 | -0.840277 |
| 24 | 1  | 0 | -0.998012 | -2.093392 | -0.295258 |
| 25 | 8  | 0 | 2.283799  | 0.655771  | 1.555336  |
| 26 | 1  | 0 | 3.051206  | 0.630974  | 0.966431  |
| 27 | 1  | 0 | 2.458716  | 0.006573  | 2.353476  |
| 28 | 8  | 0 | 1.378020  | 0.084256  | -1.258794 |
| 29 | 1  | 0 | 0.759292  | 0.094308  | -2.005784 |
| 30 | 1  | 0 | 2.001586  | -0.640610 | -1.409266 |
| 31 | 17 | 0 | -0.618428 | 0.660325  | 2.821926  |

### PC-3

| Center<br>Number | Atomic<br>Number | Atomic<br>Type | Coordinates (Angstroms) |           |           |
|------------------|------------------|----------------|-------------------------|-----------|-----------|
|                  |                  |                | X                       | Y         | Z         |
| 1                | 17               | 0              | -2.120734               | 0.975047  | -0.502924 |
| 2                | 17               | 0              | 0.262613                | 1.982970  | -2.867007 |
| 3                | 7                | 0              | 0.647992                | 2.350147  | 0.274989  |
| 4                | 6                | 0              | 1.657800                | 2.451419  | 1.211141  |
| 5                | 6                | 0              | 0.018635                | 3.514923  | 0.244284  |
| 6                | 1                | 0              | 2.323253                | 1.627890  | 1.420774  |
| 7                | 1                | 0              | -0.823021               | 3.757106  | -0.385144 |
| 8                | 1                | 0              | 2.233837                | 4.180491  | 2.498376  |
| 9                | 1                | 0              | 0.294995                | 5.304302  | 1.294780  |
| 10               | 7                | 0              | 0.589024                | 4.352224  | 1.124319  |
| 11               | 6                | 0              | 1.625631                | 3.705225  | 1.747321  |
| 12               | 76               | 0              | 0.215379                | 0.697292  | -0.857354 |
| 13               | 8                | 0              | 2.285515                | 0.306815  | -1.096451 |
| 14               | 1                | 0              | 2.467112                | -0.456185 | -1.668146 |
| 15               | 1                | 0              | 2.818932                | 1.048862  | -1.420752 |
| 16               | 8                | 0              | 0.328489                | -0.531788 | 0.832181  |
| 17               | 1                | 0              | 0.166478                | -0.114386 | 1.690195  |
| 18               | 1                | 0              | -0.282468               | -1.337294 | 0.702228  |
| 19               | 8                | 0              | -0.104397               | -1.110817 | -2.020179 |
| 20               | 1                | 0              | -0.638884               | -0.953269 | -2.810850 |
| 21               | 1                | 0              | -0.591688               | -1.754052 | -1.431615 |
| 22               | 16               | 0              | -2.679699               | -2.466715 | 0.150887  |
| 23               | 8                | 0              | -1.125604               | -2.397101 | -0.011426 |
| 24               | 6                | 0              | -2.989382               | -1.729044 | 1.758398  |
| 25               | 1                | 0              | -4.037021               | -1.891950 | 2.016610  |
| 26               | 1                | 0              | -2.327689               | -2.194785 | 2.491068  |
| 27               | 1                | 0              | -2.789079               | -0.661553 | 1.662268  |
| 28               | 6                | 0              | -2.961544               | -4.189172 | 0.570801  |
| 29               | 1                | 0              | -2.694202               | -4.779009 | -0.305550 |
| 30               | 1                | 0              | -2.333803               | -4.454428 | 1.422471  |
| 31               | 1                | 0              | -4.019868               | -4.320580 | 0.801169  |

### RC-3'

| Center | Atomic | Atomic | Coordinates (Angstroms) |  |  |
|--------|--------|--------|-------------------------|--|--|
|--------|--------|--------|-------------------------|--|--|

| Number | Number | Type | X         | Y         | Z         |
|--------|--------|------|-----------|-----------|-----------|
| 1      | 17     | 0    | 2.132108  | 0.524324  | -1.431280 |
| 2      | 16     | 0    | 1.080297  | -2.093413 | 0.495917  |
| 3      | 8      | 0    | 2.116301  | -2.201130 | 1.601134  |
| 4      | 6      | 0    | -0.274782 | -3.189549 | 0.883479  |
| 5      | 1      | 0    | -0.994652 | -3.146512 | 0.063666  |
| 6      | 1      | 0    | 0.130522  | -4.194549 | 1.007659  |
| 7      | 1      | 0    | -0.723669 | -2.821214 | 1.805072  |
| 8      | 6      | 0    | 1.756983  | -2.846141 | -0.973998 |
| 9      | 1      | 0    | 2.647035  | -2.273173 | -1.233363 |
| 10     | 1      | 0    | 2.006846  | -3.880744 | -0.735181 |
| 11     | 1      | 0    | 1.015063  | -2.775279 | -1.772361 |
| 12     | 7      | 0    | 0.146007  | 2.229632  | 0.307138  |
| 13     | 6      | 0    | 0.065633  | 3.048046  | 1.413887  |
| 14     | 6      | 0    | -0.042969 | 2.985896  | -0.762741 |
| 15     | 1      | 0    | 0.177706  | 2.657063  | 2.412824  |
| 16     | 1      | 0    | -0.037352 | 2.642491  | -1.785015 |
| 17     | 1      | 0    | -0.303979 | 5.245927  | 1.527972  |
| 18     | 1      | 0    | -0.410673 | 5.031189  | -1.004906 |
| 19     | 7      | 0    | -0.240459 | 4.255283  | -0.379824 |
| 20     | 6      | 0    | -0.174854 | 4.321680  | 0.990442  |
| 21     | 76     | 0    | 0.504204  | 0.191498  | 0.303842  |
| 22     | 8      | 0    | -0.006576 | -1.191293 | -3.110218 |
| 23     | 8      | 0    | 1.949896  | 0.378441  | 1.802006  |
| 24     | 1      | 0    | 2.667168  | 1.009810  | 1.639573  |
| 25     | 8      | 0    | -0.986663 | 0.122878  | -1.187594 |
| 26     | 1      | 0    | -1.814803 | -0.253511 | -0.852686 |
| 27     | 1      | 0    | -0.689244 | -0.420995 | -2.000511 |
| 28     | 1      | 0    | 2.322568  | -0.532490 | 1.968596  |
| 29     | 17     | 0    | -1.209099 | -0.067268 | 1.951316  |
| 30     | 1      | 0    | -0.487974 | -1.233318 | -3.947003 |
| 31     | 1      | 0    | 0.830885  | -0.738937 | -3.293167 |

### TS-3'

| Center Number | Atomic Number | Atomic Type | Coordinates (Angstroms) |           |           |
|---------------|---------------|-------------|-------------------------|-----------|-----------|
|               |               |             | X                       | Y         | Z         |
| 1             | 17            | 0           | 1.100283                | 0.695954  | -1.944864 |
| 2             | 7             | 0           | -0.052740               | 2.431641  | 0.437490  |
| 3             | 6             | 0           | -1.012378               | 2.972676  | 1.278570  |
| 4             | 6             | 0           | 0.356226                | 3.401589  | -0.381647 |
| 5             | 1             | 0           | -1.482339               | 2.391147  | 2.054318  |
| 6             | 1             | 0           | 1.084425                | 3.296284  | -1.169841 |
| 7             | 1             | 0           | -1.810945               | 5.048583  | 1.353268  |
| 8             | 1             | 0           | -0.177109               | 5.405030  | -0.568902 |
| 9             | 7             | 0           | -0.301815               | 4.522105  | -0.090153 |
| 10            | 6             | 0           | -1.172458               | 4.281660  | 0.948539  |
| 11            | 76            | 0           | 0.632690                | 0.532655  | 0.451372  |
| 12            | 8             | 0           | 2.580818                | 1.356603  | 0.614948  |
| 13            | 1             | 0           | 2.957382                | 1.464955  | -0.276293 |
| 14            | 8             | 0           | -1.417724               | -0.091720 | 0.293409  |
| 15            | 1             | 0           | -1.969650               | 0.397282  | -0.337098 |
| 16            | 1             | 0           | -1.859711               | -0.080485 | 1.160157  |
| 17            | 1             | 0           | 3.112944                | 0.667171  | 1.059624  |
| 18            | 17            | 0           | 0.173322                | 0.342009  | 2.841893  |
| 19            | 16            | 0           | 0.444084                | -2.207261 | -0.370226 |

|    |   |   |           |           |           |
|----|---|---|-----------|-----------|-----------|
| 20 | 8 | 0 | 1.755583  | -2.978475 | -0.361360 |
| 21 | 6 | 0 | -0.718205 | -3.121647 | 0.649496  |
| 22 | 1 | 0 | -1.713808 | -2.695828 | 0.523530  |
| 23 | 1 | 0 | -0.691583 | -4.167323 | 0.338496  |
| 24 | 1 | 0 | -0.389910 | -3.019929 | 1.684829  |
| 25 | 6 | 0 | -0.311533 | -2.417510 | -1.979119 |
| 26 | 1 | 0 | 0.366062  | -1.975111 | -2.708237 |
| 27 | 1 | 0 | -0.451603 | -3.483931 | -2.161208 |
| 28 | 1 | 0 | -1.265109 | -1.886445 | -1.981181 |
| 29 | 8 | 0 | 2.401839  | -1.072512 | 1.356325  |
| 30 | 1 | 0 | 2.503118  | -1.900573 | 0.830940  |
| 31 | 1 | 0 | 2.113411  | -1.313441 | 2.248569  |

PC-3'

| Center<br>Number | Atomic<br>Number | Atomic<br>Type | Coordinates (Angstroms) |           |           |
|------------------|------------------|----------------|-------------------------|-----------|-----------|
|                  |                  |                | X                       | Y         | Z         |
| 1                | 17               | 0              | -0.718865               | -0.704164 | -1.128075 |
| 2                | 17               | 0              | 2.722058                | 0.637502  | 2.057724  |
| 3                | 7                | 0              | 0.631965                | 2.024258  | 0.006184  |
| 4                | 6                | 0              | 1.495647                | 3.094602  | 0.159301  |
| 5                | 6                | 0              | -0.514596               | 2.504324  | -0.470433 |
| 6                | 1                | 0              | 2.492134                | 2.961670  | 0.547390  |
| 7                | 1                | 0              | -1.387351               | 1.916012  | -0.706519 |
| 8                | 1                | 0              | 1.162894                | 5.254680  | -0.274604 |
| 9                | 1                | 0              | -1.144510               | 4.429893  | -0.967178 |
| 10               | 7                | 0              | -0.410211               | 3.826435  | -0.621496 |
| 11               | 6                | 0              | 0.849538                | 4.225003  | -0.235761 |
| 12               | 76               | 0              | 0.978378                | 0.064590  | 0.456616  |
| 13               | 8                | 0              | 2.406602                | -0.149545 | -1.062081 |
| 14               | 1                | 0              | 2.064546                | -0.280872 | -1.959962 |
| 15               | 1                | 0              | 3.161853                | 0.456049  | -1.092984 |
| 16               | 8                | 0              | -0.428446               | 0.127386  | 1.953440  |
| 17               | 1                | 0              | -0.858652               | -0.821733 | 2.042168  |
| 18               | 1                | 0              | -0.072081               | 0.420040  | 2.806003  |
| 19               | 8                | 0              | 1.314100                | -1.985062 | 0.957991  |
| 20               | 1                | 0              | 2.011697                | -2.100729 | 1.621323  |
| 21               | 1                | 0              | 0.474685                | -2.376271 | 1.310176  |
| 22               | 16               | 0              | -2.397541               | -2.670766 | 1.161639  |
| 23               | 8                | 0              | -1.119680               | -2.240187 | 1.958194  |
| 24               | 6                | 0              | -3.264634               | -3.715848 | 2.336707  |
| 25               | 1                | 0              | -4.103652               | -4.190291 | 1.825092  |
| 26               | 1                | 0              | -2.568130               | -4.457878 | 2.729176  |
| 27               | 1                | 0              | -3.630290               | -3.068645 | 3.133398  |
| 28               | 6                | 0              | -1.785272               | -3.935484 | 0.046929  |
| 29               | 1                | 0              | -1.147460               | -3.428588 | -0.677634 |
| 30               | 1                | 0              | -1.223412               | -4.669809 | 0.626941  |
| 31               | 1                | 0              | -2.636312               | -4.397702 | -0.455649 |
